# Supplementary material for: MRI-based brain volumes of preterm infants at term: a systematic review and meta-analysis
Source: PubMed Central journal article supplement — Arch Dis Child Fetal Neonatal Ed. 2022 Jan 25;107(5):520–6. doi: 10.1136/archdischild-2021-322846 (PMC9411894; doi:10.1136/archdischild-2021-322846), 2022-01-25
Supplement: fetalneonatal-2021-322846supp001.pdf [file fetalneonatal-2021-322846supp001.pdf]

**Magnetic Resonance Imaging-based brain volumes of preterm infants at term: a systematic review**

Julia Romberg, Marko Wilke, Christoph Allgaier, Thomas Nägele, Corinna Engel, Christian F. Poets, Axel R. Franz

**Supplemental Material****Address correspondence to:**

Julia Romberg, MD

Department of Neonatology, University Children's Hospital, Calwerstr. 7, 72076 Tübingen, Germany

Phone: +49 07071 29-62374

E-mail: [julia.romberg@med.uni-tuebingen.de](mailto:julia.romberg@med.uni-tuebingen.de)

**Supplemental Table S1:** Brain volumes by MRI at term in contemporary populations of term born infants

|                                                                                               | <b>N</b> | <b>PMA at Scan</b><br><b>[weeks]</b><br><b>mean</b><br><b>(SD)</b> | <b>Total Brain Volume</b><br><b>[ml]</b><br><b>mean (SD)</b> | <b>Cerebellar Volume</b><br><b>[ml]</b><br><b>mean (SD)</b> | <b>Cortical Gray Matter Volume</b><br><b>[ml]</b><br><b>mean (SD)</b> | <b>Unmyelinated White Matter Volume</b><br><b>[ml]</b><br><b>mean (SD)</b> |
|-----------------------------------------------------------------------------------------------|----------|--------------------------------------------------------------------|--------------------------------------------------------------|-------------------------------------------------------------|-----------------------------------------------------------------------|----------------------------------------------------------------------------|
| Inder 2005 [9]*                                                                               | 21**     |                                                                    | 457 (67)                                                     |                                                             | 227 (26)                                                              | 206.5 (78)                                                                 |
| Parikh 2013 [5]*                                                                              | 16       | 39.0 (1.0)                                                         | 317 (36)                                                     | 19.6 (2.5)                                                  |                                                                       |                                                                            |
| Thompson 2007 [31]*                                                                           | 36       | 40.2 (1.5)                                                         | 420 (50)                                                     |                                                             | 173 (32)                                                              | 221 (34)                                                                   |
| Vasu 2014 [37]*                                                                               | 19       | 41.4 (1.2)                                                         | 494 (8.7)                                                    |                                                             |                                                                       |                                                                            |
| <b>Aggregate data all studies (Weighted Mean (<math>\sqrt{\text{Total Variance}}</math>))</b> |          |                                                                    | <b>425 (74)</b>                                              | <b>20 (3)</b>                                               | <b>193 (40)</b>                                                       | <b>216 (55)</b>                                                            |
| <b>Aggregate data all studies Mean (SD) by Simulation</b>                                     |          |                                                                    | <b>439 (80) ***</b>                                          |                                                             | <b>193 (43) ***</b>                                                   | <b>231 (47) ***</b>                                                        |

\* reference number refers to list of references in the main manuscript

\*\* including 11 patients from Melbourne

\*\*\* Adjusted R2 for TBV 0.7208, for CGM 0.9941, for UWM 0.9092
